# Supplementary material for: A novel tree-based procedure for deciphering the genomic spectrum of clinical disease entities
Source: Springer Nature journal article supplement (doi:10.1186/2043-9113-4-6), 2014-01-01

### Step 1. Construction of a maximal tree

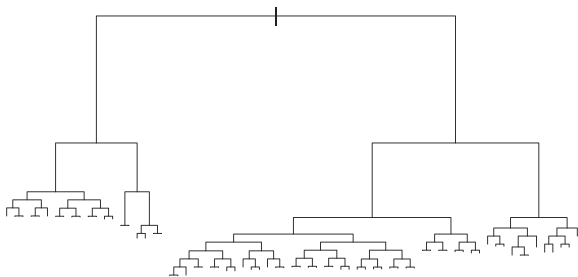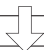

### Step 2. Construction of the sequence of nested subtrees

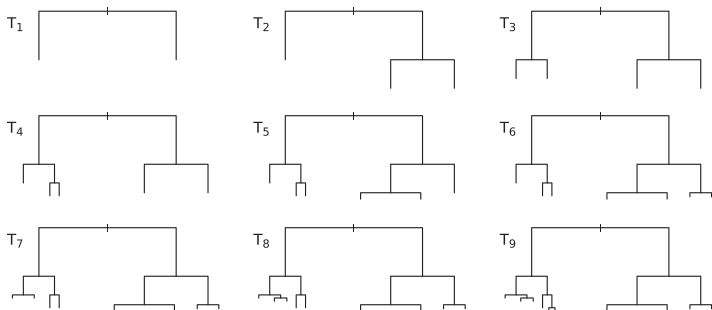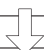

### Step 3. Tree selection

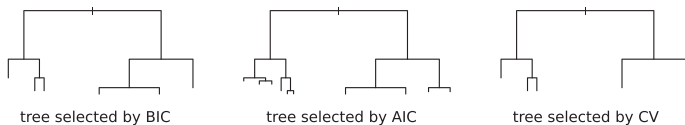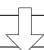

### Step 4. Testing

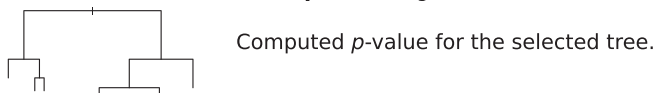

Supplement: 13336_2013_97_MOESM1_ESM.pdf [file 13336_2013_97_MOESM1_ESM.pdf]
