# Supplementary material for: A novel tree-based procedure for deciphering the genomic spectrum of clinical disease entities
Source: Springer Nature journal article supplement (doi:10.1186/2043-9113-4-6), 2014-01-01

**Trees with 2 leaves**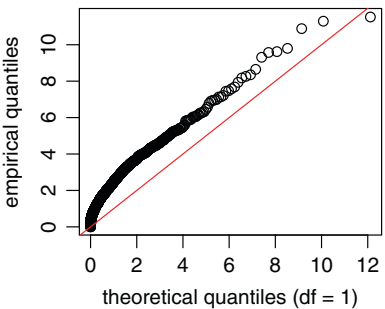**Trees with 3 leaves**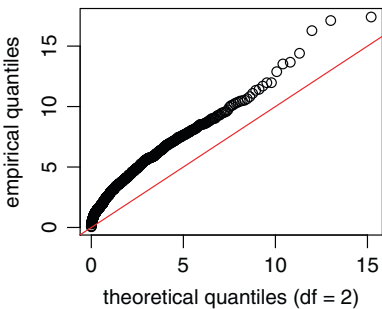**Trees with 4 leaves**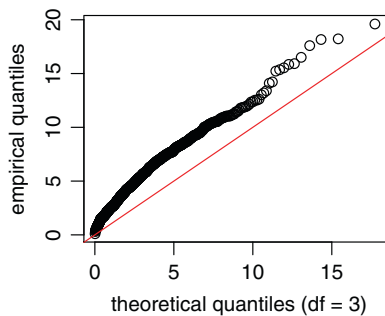**Trees with 5 leaves**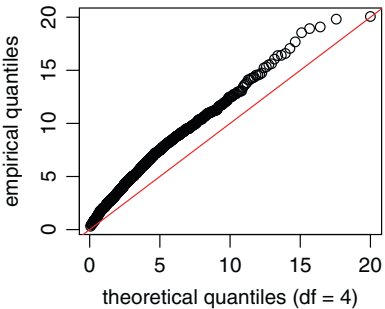**Trees with 6 leaves**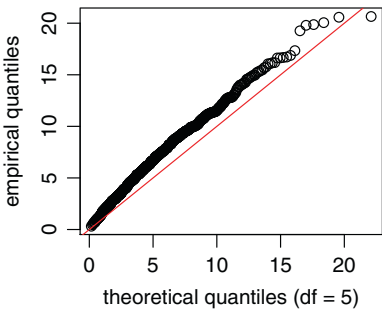**Trees with 7 leaves**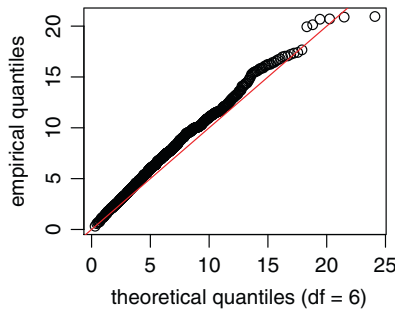**Trees with 8 leaves**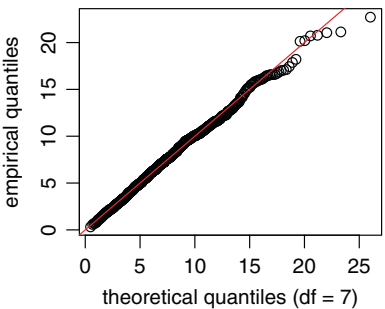

Supplement: 13336_2013_97_MOESM4_ESM.pdf [file 13336_2013_97_MOESM4_ESM.pdf]
