# Supplementary material for: A novel tree-based procedure for deciphering the genomic spectrum of clinical disease entities
Source: Springer Nature journal article supplement (doi:10.1186/2043-9113-4-6), 2014-01-01
Supplement: 13336_2013_97_MOESM5_ESM.pdf [file 13336_2013_97_MOESM5_ESM.pdf]

**Trees with 2 leaves**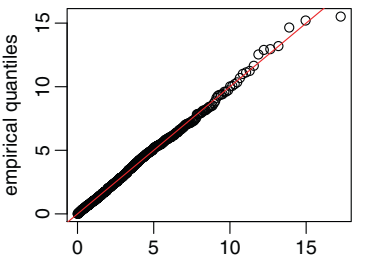

theoretical quantiles (df = 2.81, m = 1.35)

**Trees with 3 leaves**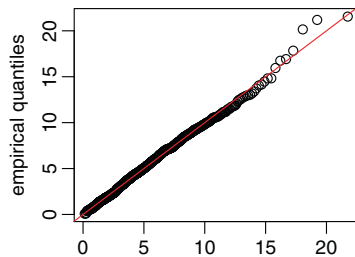

theoretical quantiles (df = 4.83, m = 1.24)

**Trees with 4 leaves**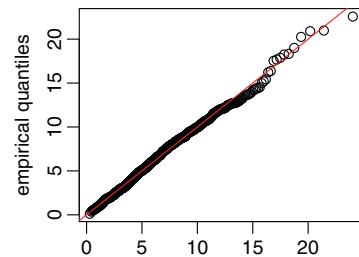

theoretical quantiles (df = 5.97, m = 1.15)

**Trees with 5 leaves**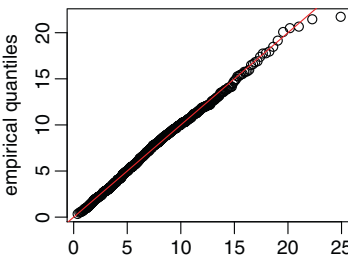

theoretical quantiles (df = 6.42, m = 1.08)

**Trees with 6 leaves**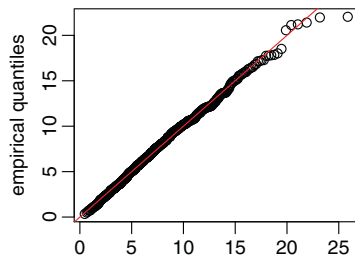

theoretical quantiles (df = 6.92, m = 1.07)

**Trees with 7 leaves**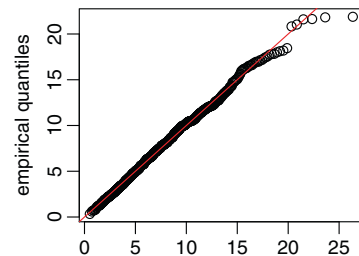

theoretical quantiles (df = 7.18, m = 1.04)

**Trees with 8 leaves**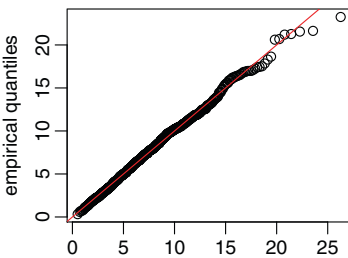

theoretical quantiles (df = 7.14, m = 1.02)
