# Supplementary material for: A novel tree-based procedure for deciphering the genomic spectrum of clinical disease entities
Source: Springer Nature journal article supplement (doi:10.1186/2043-9113-4-6), 2014-01-01

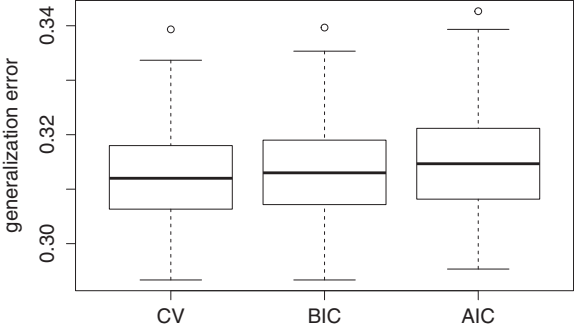

Supplement: 13336_2013_97_MOESM6_ESM.pdf [file 13336_2013_97_MOESM6_ESM.pdf]
