# Supplementary material for: A novel tree-based procedure for deciphering the genomic spectrum of clinical disease entities
Source: Springer Nature journal article supplement (doi:10.1186/2043-9113-4-6), 2014-01-01

(a) BIC ( $p = 0.011$ ;  $CV_{err} = 0.23$ )

(b) Original PLTR ( $p = 0.0055$ ;  $CV_{err} = 0.23$ )

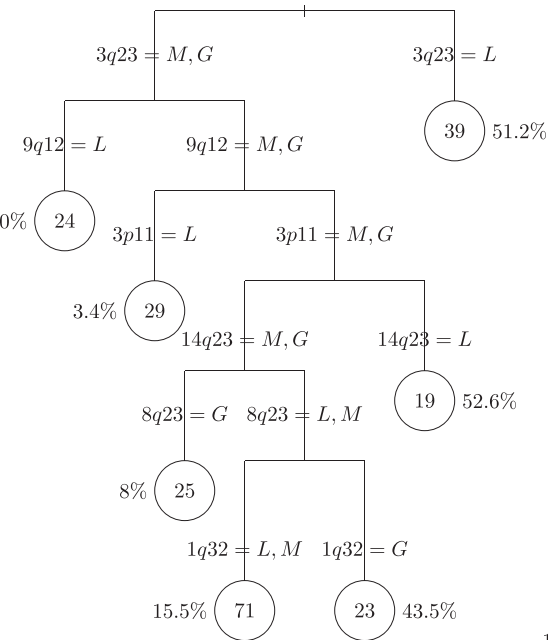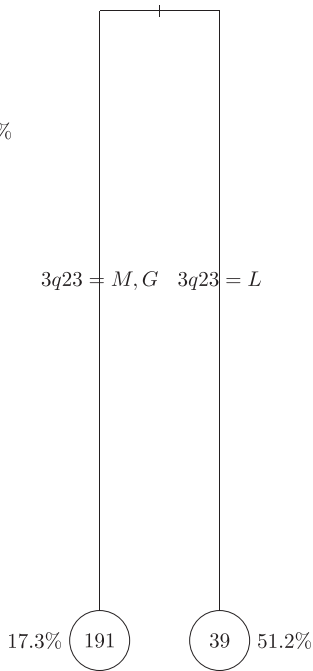

Supplement: 13336_2013_97_MOESM7_ESM.pdf [file 13336_2013_97_MOESM7_ESM.pdf]
